# Supplementary material for: Microplastic pollution in typical seasonal rivers in northern China: temporal variation and risk assessment
Source: Royal Society of Chemistry journal article supplement (doi:10.1039/d3em00281k), 2023-01-01
Supplement: d3em00281k1.pdf [file d3em00281k1.pdf]

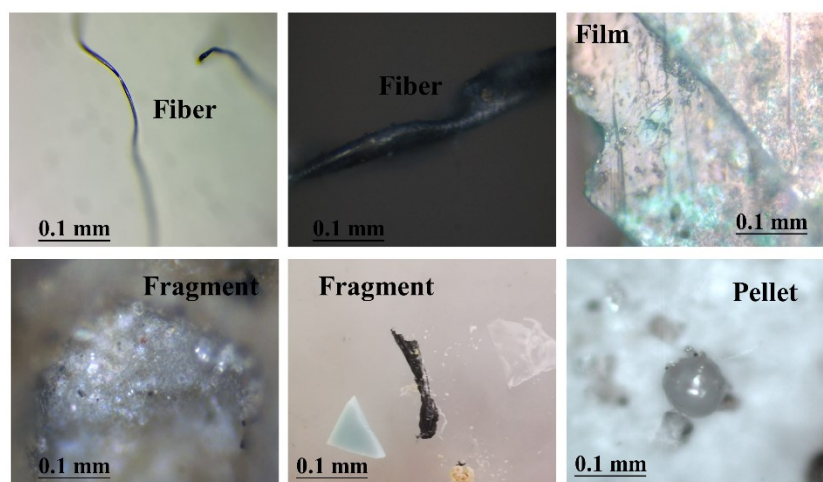

Fig. S1 Photographs of microplastics items identified using microscopes.

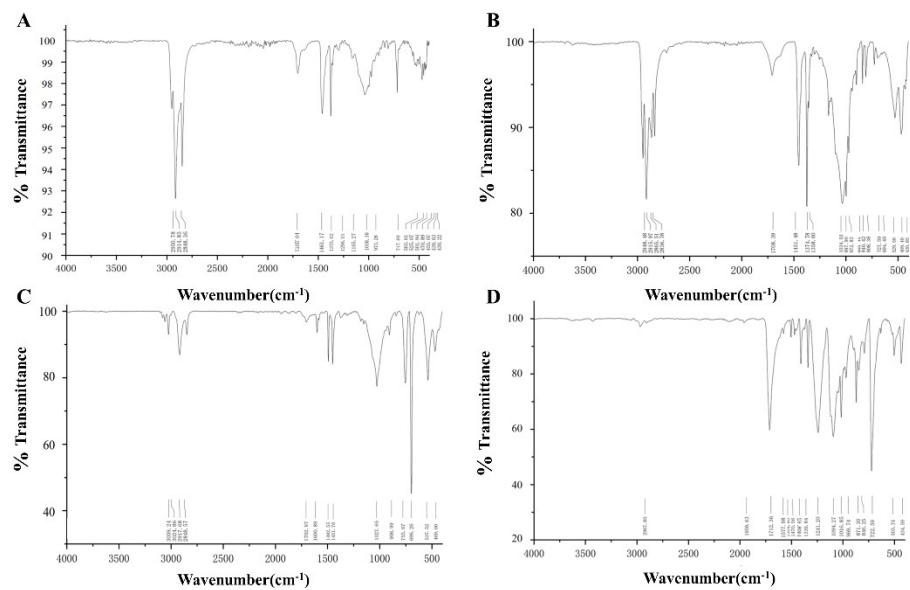

Fig. S2 ATR-FTIR spectra of the main polymers present in the types of MPs: A polyethylene (PE); B polypropylene (PP); C Polystyrene (PS); D polyethylene terephthalate (PET).

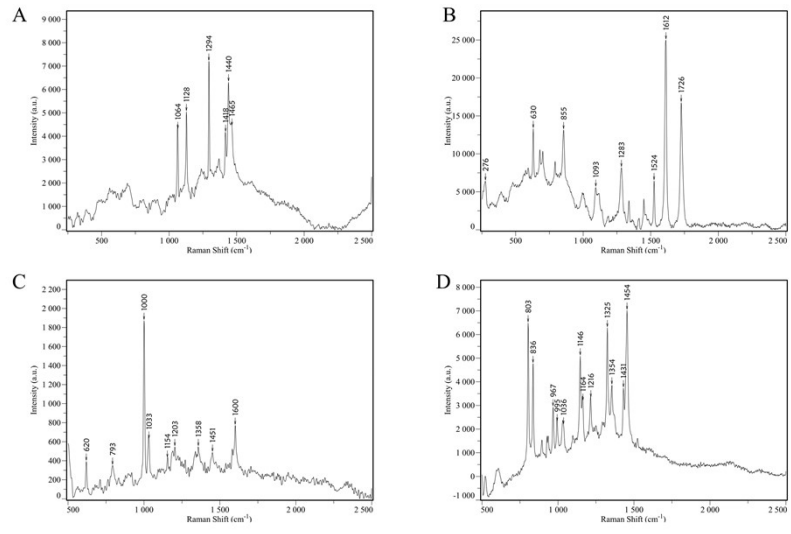

Fig. S3 Raman spectroscopy of the main polymers present in the types of MPs: A polyethylene (PE); B polyethylene terephthalate (PET); C Polystyrene (PS); D polypropylene (PP).
